# Supplementary material for: Altered vector competence in an experimental mosquito-mouse transmission model of Zika infection
Source: PubMed Central journal article supplement (PMC5854422; doi:10.1371/journal.pntd.0006350), 2018-03-05
Supplement: pntd.0006350.s003.pdf [file pntd.0006350.s003.pdf]

1 **Supplementary Table 1. Antibody responses of ZIKV-replicated AG129 mice**

2 **engorged upon by ZIKV-infected mosquitoes.**

| <b>Mosquito Strain</b> | <b>Days after infection (Mosquito)</b> | <b>Infection Type (Mosquito)</b> | <b>Antibody titers</b> |
|------------------------|----------------------------------------|----------------------------------|------------------------|
| PAT                    | 7                                      | Oral                             | <20                    |
| HCM                    | 7                                      | Oral                             | <20                    |
| HCM                    | 7                                      | Oral                             | <20                    |
| ORL                    | 7                                      | Injection                        | 640                    |
| ORL                    | 10                                     | Injection                        | 40                     |
| PAT                    | 7                                      | Injection                        | 160                    |
| PAT                    | 7                                      | Injection                        | 1280                   |
| PAT                    | 10                                     | Injection                        | 640                    |
| HCM                    | 7                                      | Injection                        | <20                    |
| HCM                    | 7                                      | Injection                        | 320                    |
| HCM                    | 7                                      | Injection                        | 320                    |
| HCM                    | 7                                      | Injection                        | 80                     |
| HCM                    | 10                                     | Injection                        | <20                    |

3
